# Supplementary material for: Iron in Hydroxyapatite: Interstitial or Substitution Sites?
Source: MDPI journal article supplement (doi:10.3390/nano11112978), 2021-11-05
Supplement: s1 [file s1]

# Iron in Hydroxyapatite: Interstitial or Substitution Sites?

Leon Avakyan

*Southern Federal University, 5 Zorge St., Rostov-on-Don 344090, Russian Federation*

Ekaterina Paramonova

*Institute of Mathematical Problems of Biology, Keldysh Institute of Applied Mathematics,  
Russian Academy of Sciences, 1 Vitkevicha St., Pushchino, 142290, Moscow region, Russian Federation*

Vladimir Bystrov

*Institute of Mathematical Problems of Biology, Keldysh Institute of Applied Mathematics,  
Russian Academy of Sciences, 1 Vitkevicha St., Pushchino, 142290, Moscow region, Russian Federation*

Sandrine Gomes

*Université Clermont Auvergne, Clermont Auvergne INP,  
CNRS, ICCF, F-63000 Clermont-Ferrand, France*

Guillaume Renaudin

*Université Clermont Auvergne, Clermont Auvergne INP,  
CNRS, ICCF, F-63000 Clermont-Ferrand, France*

## SUPPLEMENTARY INFORMATION

**Table S1.** Chemical potentials in eV at selected points from the phase stability diagram (Figure 2 of main text).

| $P_i$    | $\mu_{\text{Ca}} - \mu_{\text{Ca}}^0$ | $\mu_{\text{P}} - \mu_{\text{P}}^0$ | $\mu_{\text{O}} - \mu_{\text{O}}^0$ | $\mu_{\text{H}} - \mu_{\text{H}}^0$ | Coexisting phases                           |
|----------|---------------------------------------|-------------------------------------|-------------------------------------|-------------------------------------|---------------------------------------------|
| $P_1$    | -6.0                                  | -10.8                               | 0.0                                 | -1.8                                | O <sub>2</sub> , Ca(OH) <sub>2</sub> , CaO  |
| $P_2$    | -6.0                                  | -10.5                               | 0.0                                 | -2.6                                | O <sub>2</sub> , CaO, TCP                   |
| $P_3$    | -7.8                                  | -7.9                                | 0.0                                 | -1.7                                | O <sub>2</sub> , DCPA, TCP                  |
| $P_4$    | -7.7                                  | -8.1                                | 0.0                                 | -1.6                                | O <sub>2</sub> , DCPA, DCPD                 |
| $P_5$    | -6.7                                  | -9.8                                | 0.0                                 | -1.5                                | O <sub>2</sub> , Ca(OH) <sub>2</sub> , DCPD |
| $P_6$    | -2.4                                  | -1.8                                | -3.6                                | 0.0                                 | H <sub>2</sub> , Ca(OH) <sub>2</sub> , CaO  |
| $P_7$    | -1.8                                  | 0.0                                 | -4.3                                | 0.0                                 | H <sub>2</sub> , CaO, P                     |
| $P_8$    | -1.8                                  | 0.0                                 | -4.2                                | -0.5                                | CaO, P, TCP                                 |
| $P_9$    | -4.7                                  | 0.0                                 | -3.1                                | -0.2                                | DCPA, P, TCP                                |
| $P_{10}$ | -4.5                                  | 0.0                                 | -3.2                                | 0.0                                 | H <sub>2</sub> , DCPA, DCPD, P              |
| $P_{11}$ | -3.7                                  | -2.5                                | -2.9                                | 0.0                                 | H <sub>2</sub> , Ca(OH) <sub>2</sub> , DCPD |

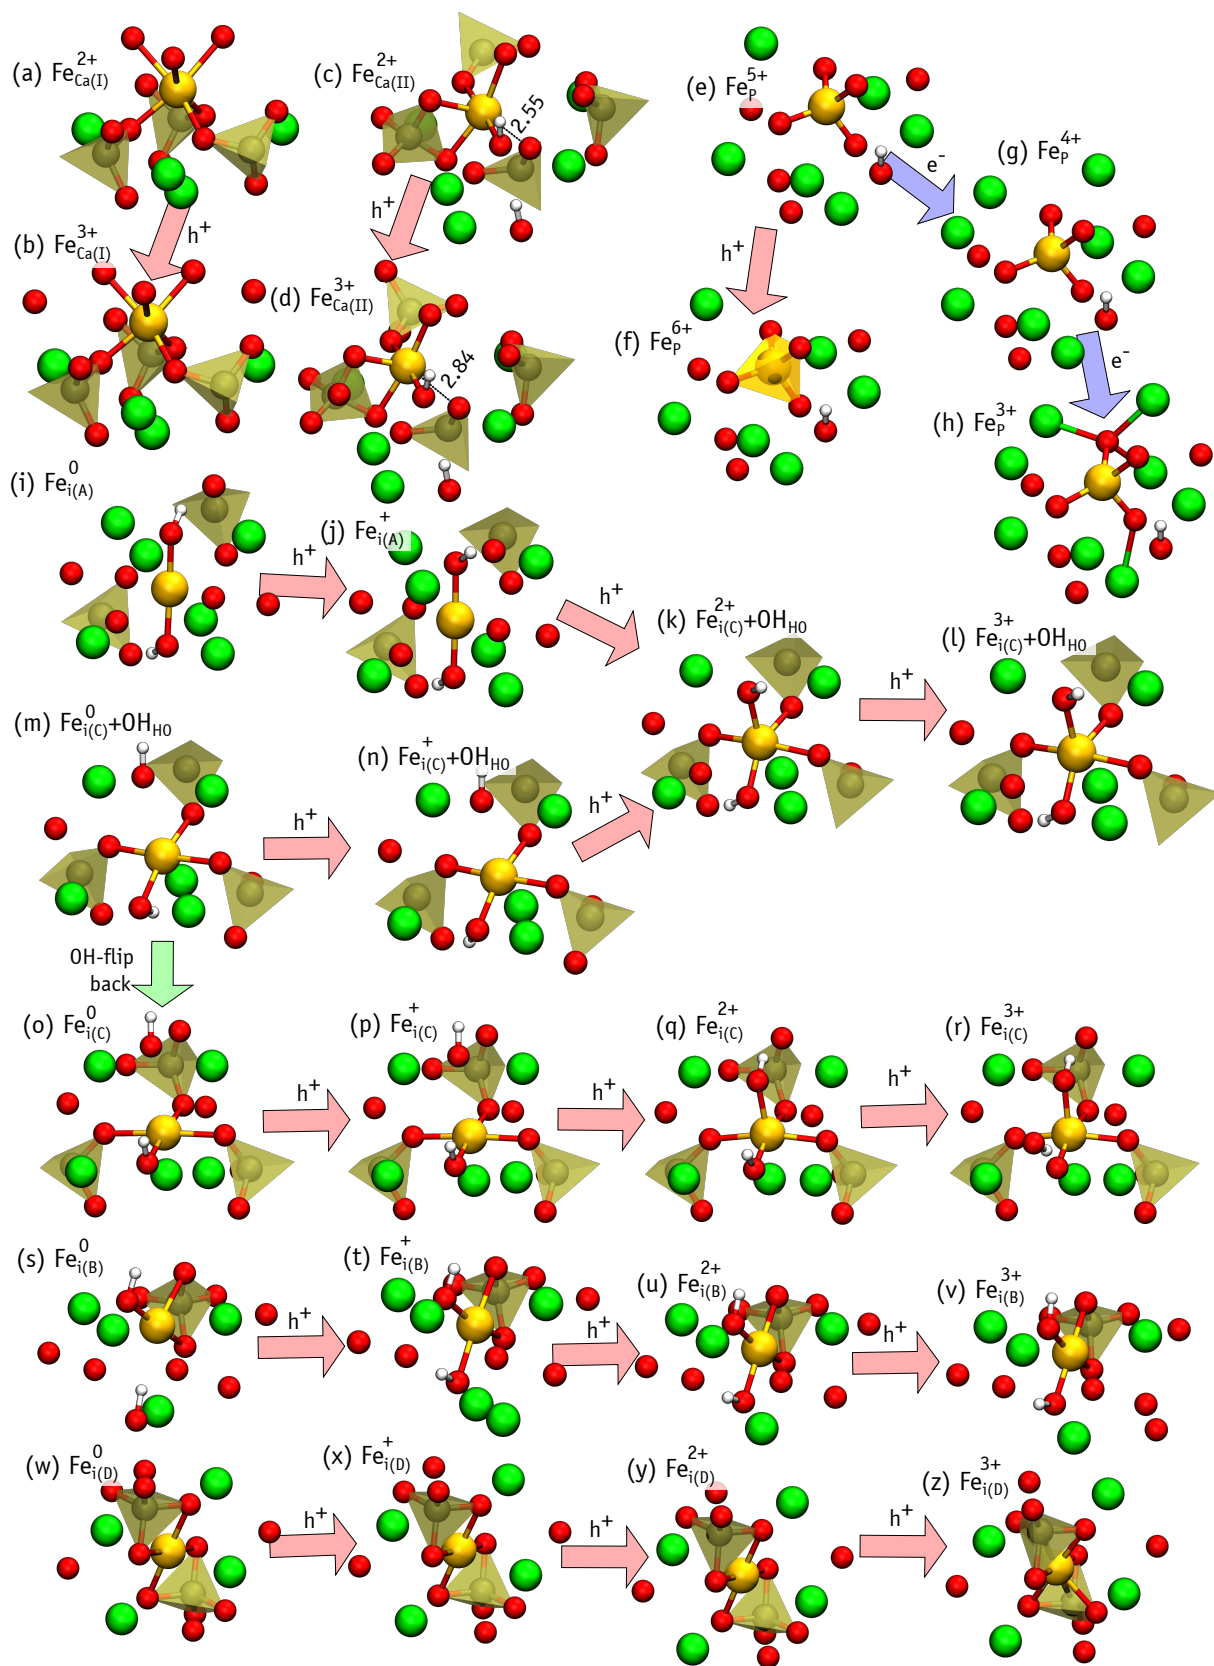

**Figure S1.** Illustration of the local atomic structure of iron atom ( $\leq 4 \text{ \AA}$ ) for all considered Fe-HAp configurations. Iron, oxygen, calcium, hydrogen and phosphorus are shown in yellow, red, green, white, and inside the tetrahedra.

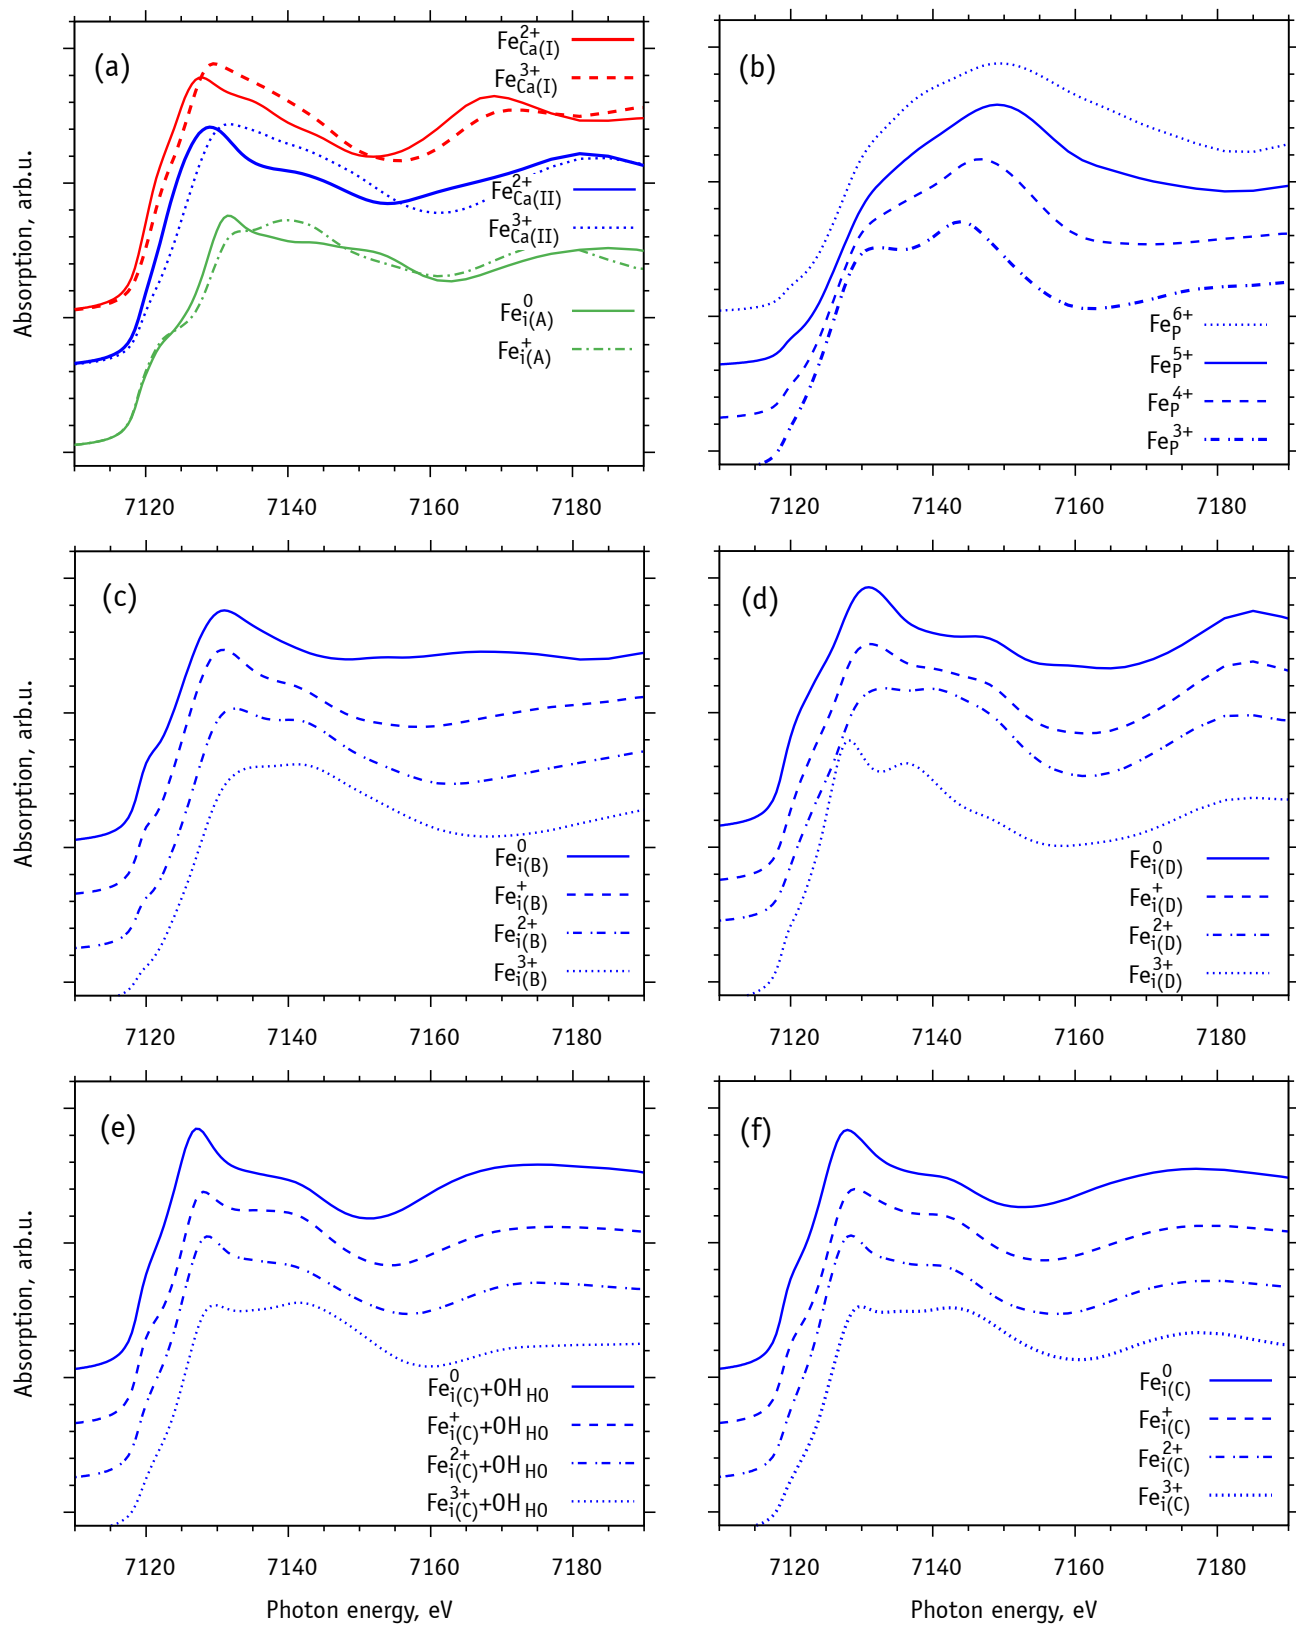

**Figure S2.** Simulated Fe K-XANES spectra for the considered Fe-HAP structures.
